# Supplementary material
Source: publisher figshare collection journal article supplement (https://acs.figshare.com/ndownloader/files/9039544)
Supplement: Supplementary file 1 [file 9039544]

# Dynamics of Exciton-Mn Energy Transfer in Mn-doped CsPbCl<sub>3</sub> Perovskite Nanocrystals

## Supporting Information

*Daniel Rossi, David Parobek, Yitong Dong and Dong Hee Son\**

Department of Chemistry, Texas A&M University, College Station, Texas 77843, United States

### **Calculation of average doping radius in Mn-doped CsPbCl<sub>3</sub>**

Assuming the average doping concentration (20 Mn/particle) and particle volume (1000 nm<sup>3</sup>), the average Mn volume density is 50 nm<sup>3</sup>. The average doping radius  $\langle r \rangle$ , assuming a constant doping density ( $\rho$ ), can be found by as follows:

$$\langle r \rangle = A \int_0^R \rho * r * 4\pi r^2 dr = A * \rho * \pi R^4 = \frac{3}{4} R$$

Where A is the normalization constant equal to  $(\rho * V)^{-1}$ . Since R is the radius of the volume containing a single Mn ion, 2.28nm, the average doping radius  $\langle r \rangle = 1.7\text{nm}$

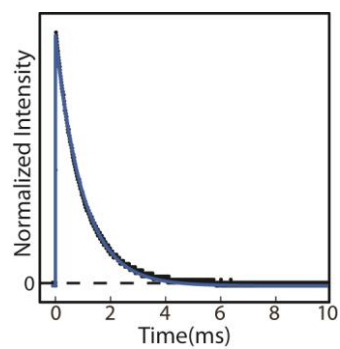

**Figure S1:** Time-dependent Mn luminescence from Mn-doped CsPbCl<sub>3</sub> nanoparticles.
